# Supplementary material for: Erk2 but not Erk1 regulates crosstalk between Met and EGFR in squamous cell carcinoma cell lines
Source: Springer Nature journal article supplement (doi:10.1186/s12943-015-0319-z), 2015-03-03

## Supplementary Figure S2

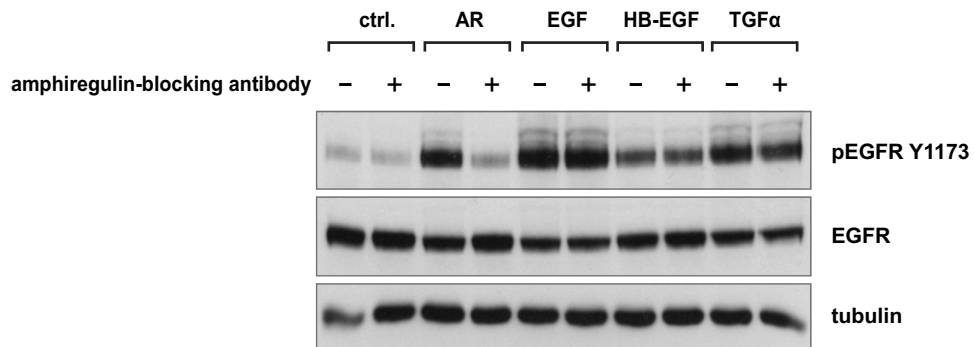

Supplement: MOESM2 [file 9762984]
