# Supplementary material for: Erk2 but not Erk1 regulates crosstalk between Met and EGFR in squamous cell carcinoma cell lines
Source: Springer Nature journal article supplement (doi:10.1186/s12943-015-0319-z), 2015-03-03

# Supplementary Figure S3

**A**

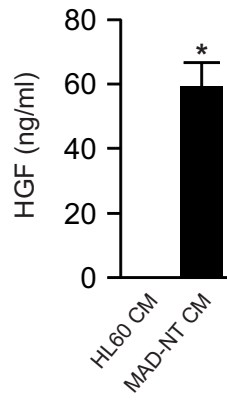

**B**

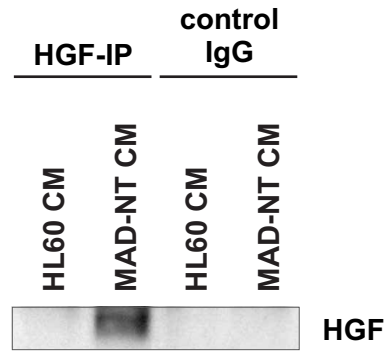

Supplement: MOESM3 [file 9762984]
